# Supplementary material for: RORγt+ innate lymphoid cells regulate intestinal homeostasis by integrating negative signals from the symbiotic microbiota
Source: Springer Nature journal article supplement (doi:10.1038/ni.2002), 2011-02-20
Supplement: 41590_2011_BFni2002_MOESM3_ESM.pdf [file 41590_2011_BFni2002_MOESM3_ESM.pdf]

**ROR $\gamma$ <sup>+</sup> innate lymphoid cells regulate intestinal homeostasis by integrating negative signals from the symbiotic microbiota**

Shinichiro Sawa<sup>1,2</sup>, Matthias Lochner<sup>1,2,3</sup>, Naoko Satoh-Takayama<sup>4,5</sup>, Sophie Dulauroy<sup>1,2</sup>, Marion Bérard<sup>6</sup>, Melanie Kleinschek<sup>7</sup>, Daniel Cua<sup>7</sup>, James P. Di Santo<sup>4,5</sup> and Gérard Eberl<sup>1,2</sup>

<sup>1</sup>Institut Pasteur, Lymphoid Tissue Development Unit, 75724 Paris, France

<sup>2</sup>CNRS, URA1961, 75724 Paris, France

<sup>3</sup>Institute of Infection Immunology, TWINCORE, Centre for Experimental and Clinical Infection Research; a joint venture between the Medical School Hannover (MHH) and the Helmholtz Centre for Infection Research (HZI), Hannover, Germany

<sup>4</sup>Institut Pasteur, Innate Immunity Unit, 75724 Paris, France

<sup>5</sup>Inserm, U668, 75724 Paris, France

<sup>6</sup>Institut Pasteur, Animalerie Centrale, 25 rue du Dr Roux, 75724 Paris, France

<sup>7</sup>Merck Research Laboratories, DNAX Discovery Research, 94304 Palo Alto, USA

**a**

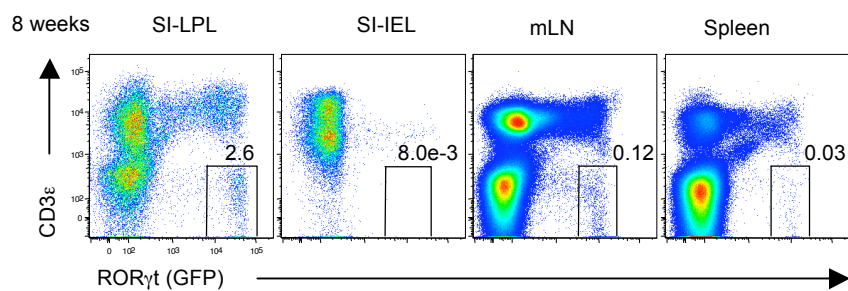

**b**

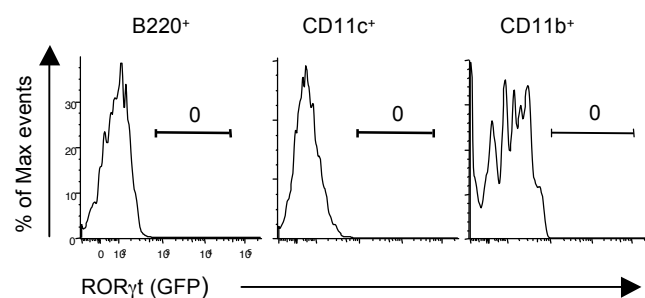

### Supplementary Figure 1

ROR $\gamma$ t<sup>+</sup> ILCs in IELs and secondary lymphoid tissues. **(a)** ROR $\gamma$ t<sup>+</sup> ILCs in the SI-LPL, intraepithelial lymphocytes (IEL), mesenteric lymph nodes (mLN) and spleen of 4 weeks old *Rorc*( $\gamma$ )-*Gfp*<sup>TG</sup> mice. Data are representative of  $n = 4$  mice. **(b)** ROR $\gamma$ t (GFP) expressions in SI-LPL B220<sup>+</sup>, CD11c<sup>+</sup> or CD11b<sup>+</sup> cells. Numbers indicate percent positive cells. Data are representative of  $n = 3$  mice.

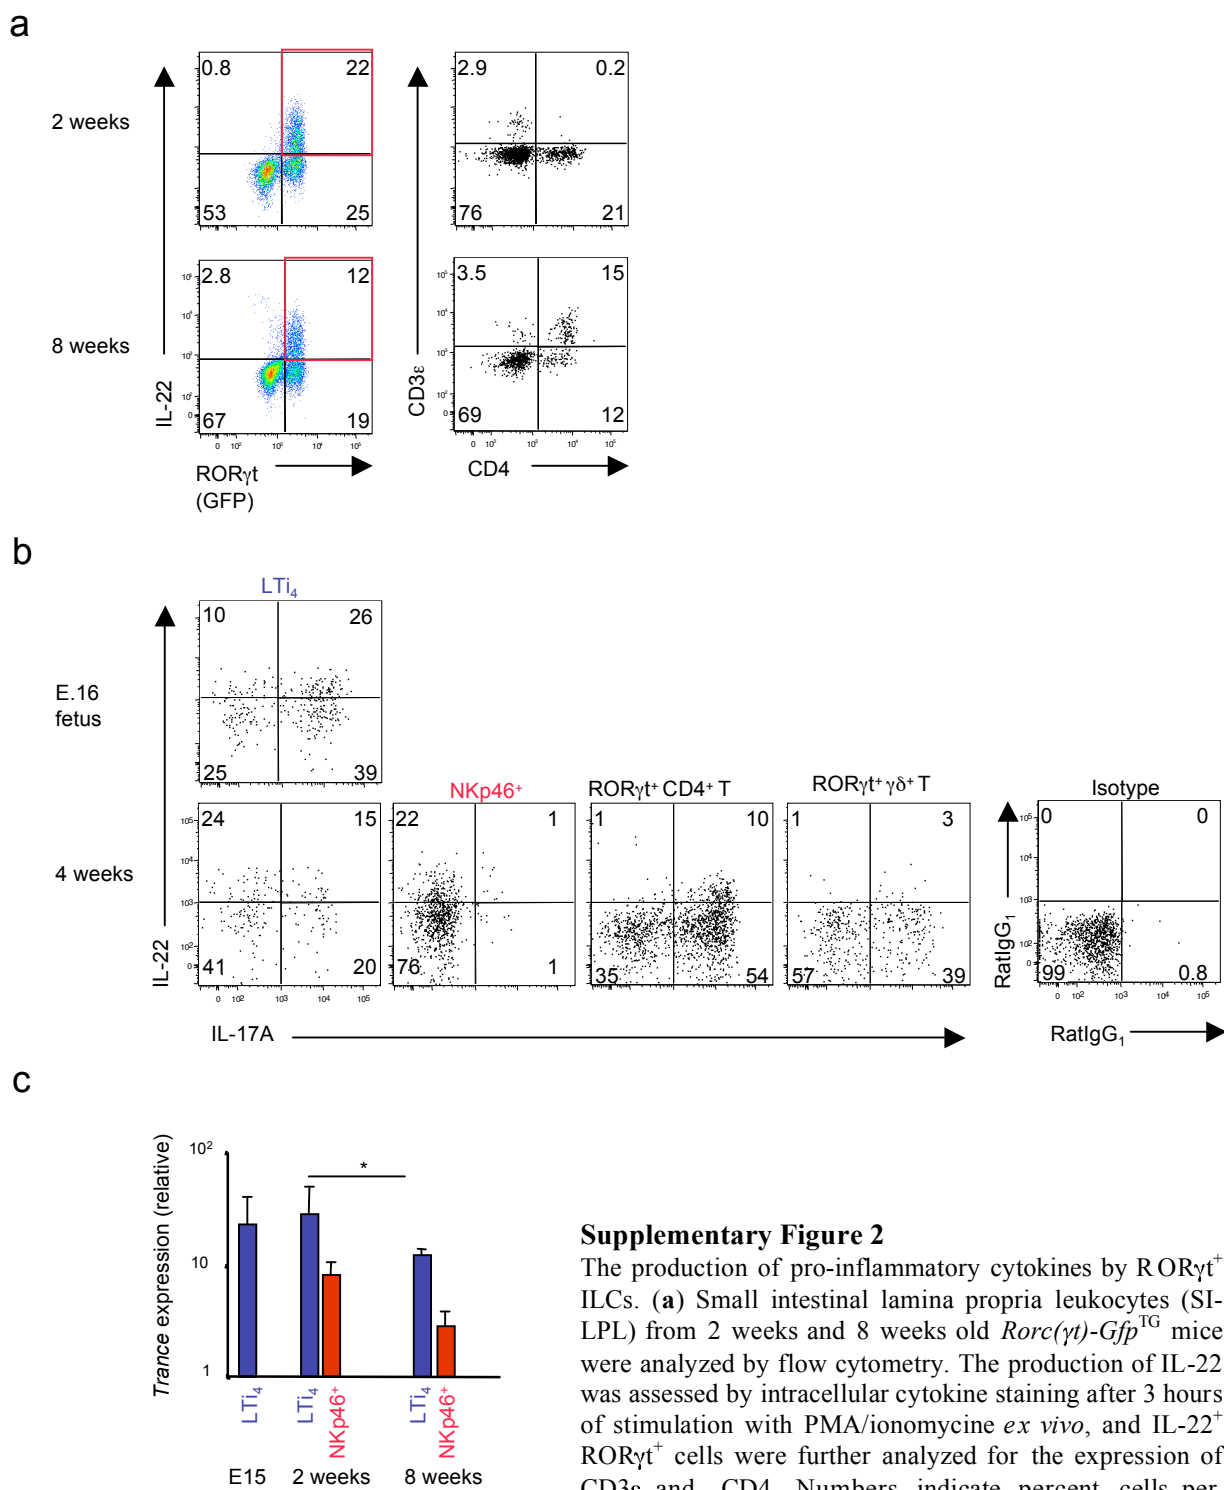

### Supplementary Figure 2

The production of pro-inflammatory cytokines by ROR $\gamma$ t<sup>+</sup> ILCs. (a) Small intestinal lamina propria leukocytes (SI-LPL) from 2 weeks and 8 weeks old *Rorc*( $\gamma$ t)-*Gfp*<sup>TG</sup> mice were analyzed by flow cytometry. The production of IL-22 was assessed by intracellular cytokine staining after 3 hours of stimulation with PMA/ionomycine *ex vivo*, and IL-22<sup>+</sup> ROR $\gamma$ t<sup>+</sup> cells were further analyzed for the expression of CD3 $\epsilon$  and CD4. Numbers indicate percent cells per quadrant. The data are representative of three independent experiments.

(b) ROR $\gamma$ t<sup>+</sup> ILCs from E16 mice, and ROR $\gamma$ t<sup>+</sup> ILCs, ROR $\gamma$ t<sup>+</sup> CD4<sup>+</sup> T cells and ROR $\gamma$ t<sup>+</sup>  $\gamma$  $\delta$ <sup>+</sup> T cells from 4 weeks old mice were analyzed for intracellular expression of IL-17 and IL-22 after 3 hours stimulation *ex vivo* with PMA/ionomycine. Data are representative of 3 independent experiments. (c) SI-LPL from E15, 2 weeks and 8 weeks old *Rorc*( $\gamma$ t)-*Gfp*<sup>TG</sup> mice were analyzed by real-time qPCR for the expression of transcripts for TRANCE. Data are mean of three independent experiments. \*  $P < 0.05$ , unpaired *t*-test.

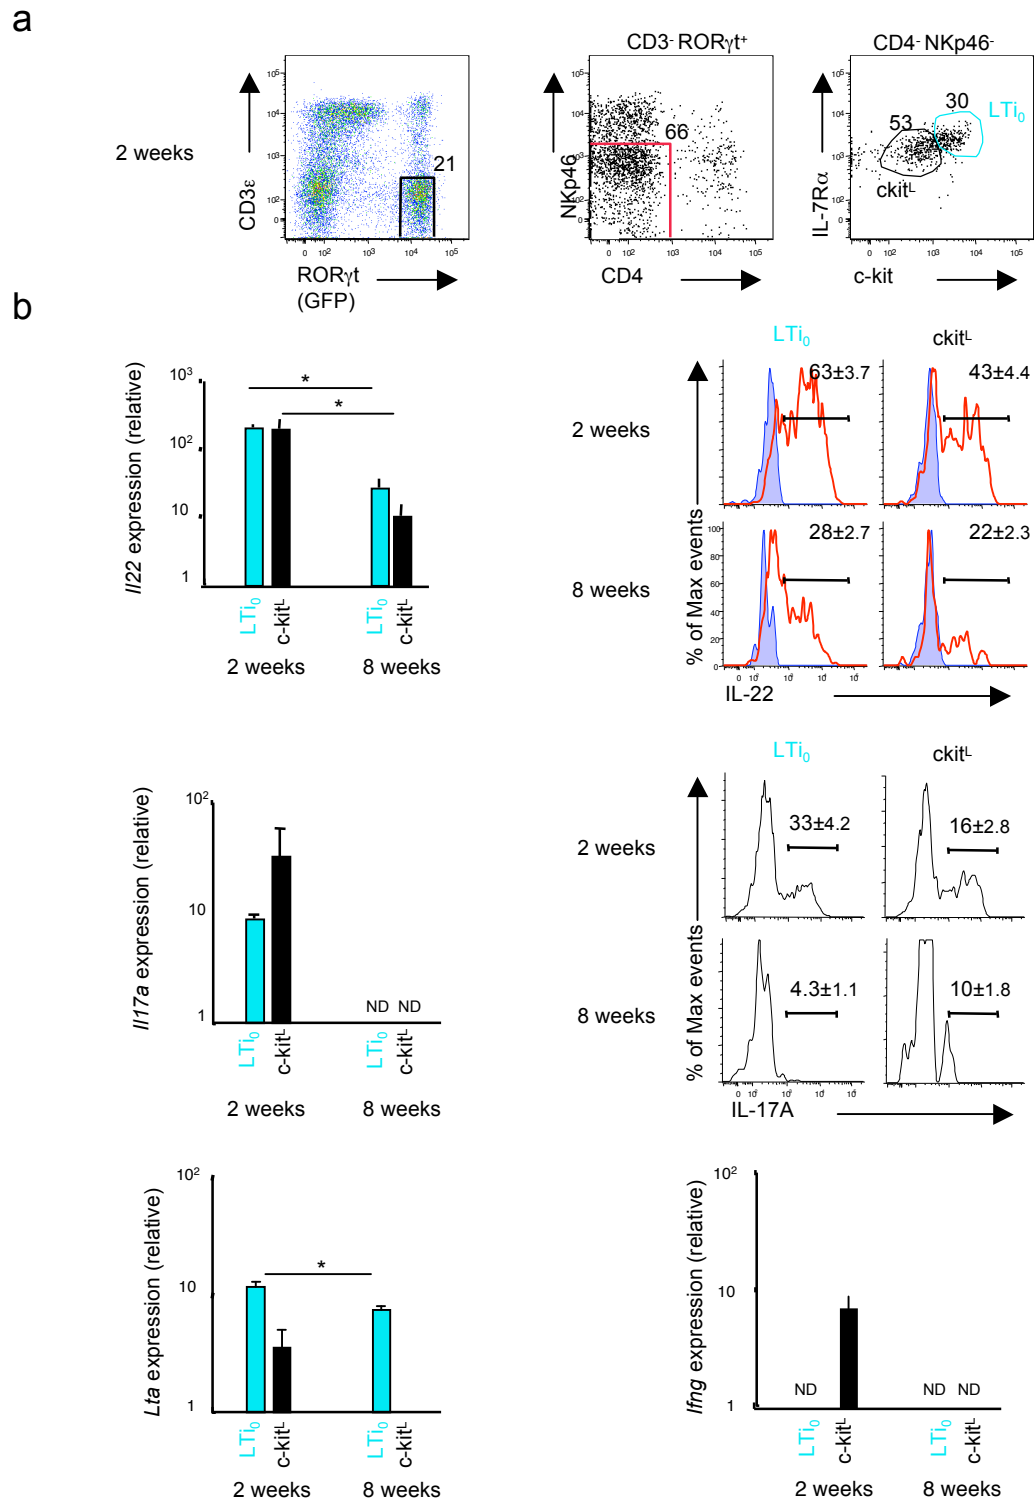

### Supplementary Figure 3

The production of pro-inflammatory cytokines by CD4<sup>+</sup> NKp46<sup>+</sup> RORγt<sup>+</sup> ILCs. **(a)** SI-LPL from 2 weeks old *Rorc(γt)-Gfp<sup>TG</sup>* mice were analyzed by flow cytometry. CD4<sup>+</sup> NKp46<sup>+</sup> RORγt<sup>+</sup> ILCs were subdivided into c-kit<sup>hi</sup> (LTi<sub>0</sub>) and c-kit<sup>lo</sup> (c-kit<sup>L</sup>) cells. Data are representative of at least  $n = 8$  mice. **(b)** Expression of transcripts and proteins for IL-22, IL-17, LTα and IFNγ by LTi<sub>0</sub> and c-kit<sup>L</sup> cells from 2 weeks and 8 weeks old *Rorc(γt)-Gfp<sup>TG</sup>* mice. Intracellular IL-22 and IL-17 protein expression was measured after 3 hours stimulation *ex vivo* with rIL-23 or PMA/ionomycin, respectively. The data are representative of five independent experiments. In histograms, numbers are mean of  $n = 10$  mice ± S.E.M percentages of IL-22<sup>+</sup> or IL-17<sup>+</sup> cells. \*  $P < 0.05$ , unpaired *t*-test, ND, non-detected.

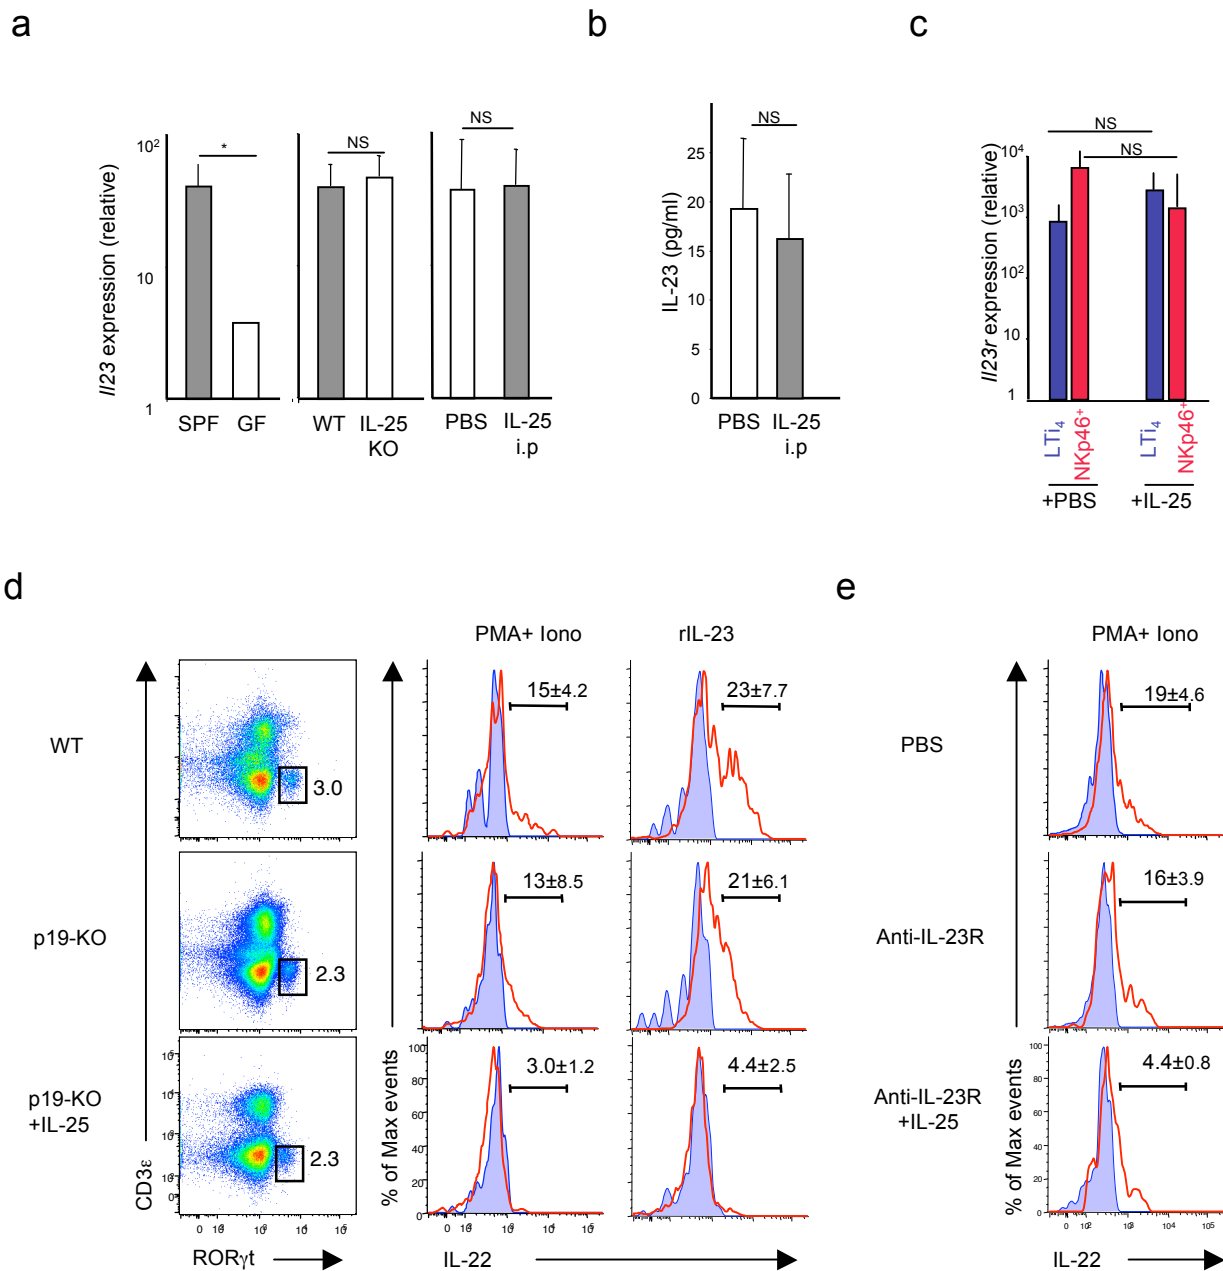

#### Supplementary Figure 4

No role for IL-23 in the IL-25-mediated regulation of IL-22 production by ROR $\gamma$ <sup>+</sup> ILCs. **(a)** Expression of transcripts for IL-23p19 (*Il23a*) in the terminal ileum of 8 weeks-old SPF, GF, wild type and IL-25-deficient mice, and 6 weeks-old wild-type mice injected with rIL-25 or PBS. **(b)** IL-23a protein expression in the terminal ileum of wild-type mice injected with rIL-25 or PBS. **(c)** IL-23 receptor (*Il23r*) expression by ROR $\gamma$ <sup>+</sup> ILCs from 6 weeks-old RAG2-deficient mice treated with rIL-25 or PBS. \**P* < 0.05, NS, statistically not significant, unpaired *t*-test. **(d)** Expression of IL-22 by ROR $\gamma$ <sup>+</sup> ILCs in the small intestine of adult p19-deficient mice treated with rIL-25 or PBS. Cells were stimulated for 3 hours *ex vivo* with PMA/ionomycin (middle columns) or rIL-23 (right columns). Data are mean  $\pm$  S.E.M of *n* = 3 mice per group. **(e)** Expression of IL-22 by ROR $\gamma$ <sup>+</sup> ILCs in 8 weeks old *Rorc*( $\gamma$ )-*Gfp*<sup>TG</sup> mice treated with neutralizing anti-IL23R antibody and rIL-25 or PBS. Cells were stimulated for 3 hours *ex vivo* with PMA/ionomycin. Data are mean  $\pm$  S.E.M of *n* = 3 mice per group.

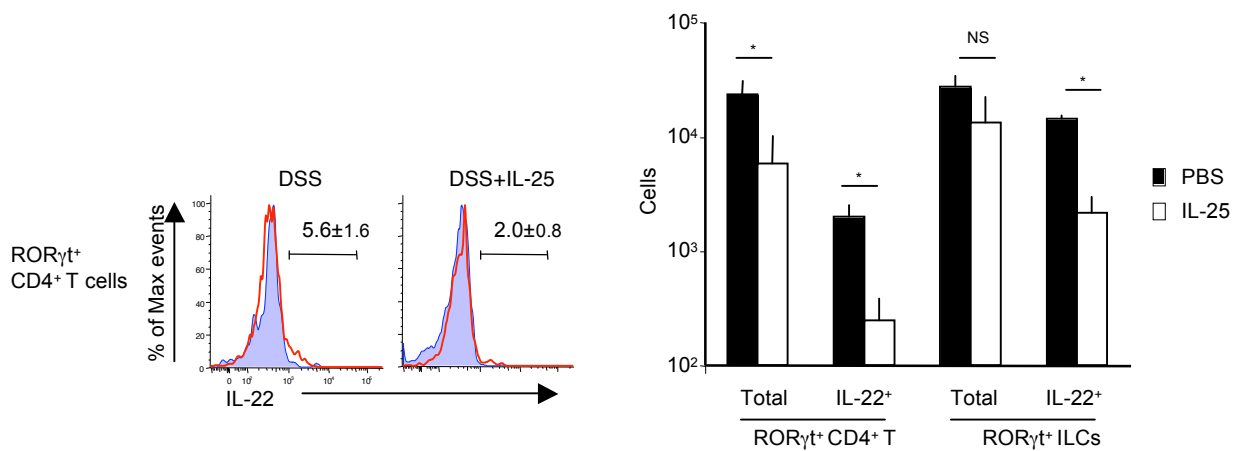

### Supplementary Figure 5

IL-25 represses IL-22 production by ROR $\gamma$ t<sup>+</sup> T cells during colitis. (Left) Expression of IL-22 by small intestinal lamina propria CD4<sup>+</sup> ROR $\gamma$ t<sup>+</sup> T cells in 9 weeks old C57/BL6 wild type mice treated with DSS. Data are mean  $\pm$  S.E.M of  $n = 3$  mice per group. Cells were stimulated for 3 hours *ex vivo* with PMA/ionomycin. (Right) Absolute numbers of small intestinal lamina propria cells in DSS-treated 9 weeks old C57/BL6 wild type mice. Data are mean  $\pm$  S.E.M of  $n = 3$  mice per group. \* $P < 0.05$ , unpaired  $t$ -test.
